# Supplementary material for: The mechanism behind the photochromism and photomagnetism of type II biindenylidenediones: multiconfigurational, perturbative and density functional theory studies
Source: Royal Society of Chemistry journal article supplement (doi:10.1039/d1cp01692j), 2021-01-01
Supplement: d1cp01692j1.pdf [file d1cp01692j1.pdf]

## Electronic Supplementary information

### Mechanism Behind the Photochromism and Photomagnetism of Biindenilidenediones type II: Multiconfigurational, Perturbative and Density Functional Theory Studies

Pedro J. Castro<sup>\*a,b</sup> and Mar Reguero<sup>b</sup>

<sup>a</sup> Quantum Chemistry Group, Departament de Química Física i Inorgànica, Universitat Rovira i Virgili, 43007, Tarragona, Spain

<sup>b</sup> Max Planck Research Group, Facultad de Química y Farmacia, Universidad del Atlántico, Puerto Colombia, 081007, Colombia

\* pedrocastro@mail.uniatlantico.edu.co

#### Section I: Gas phase

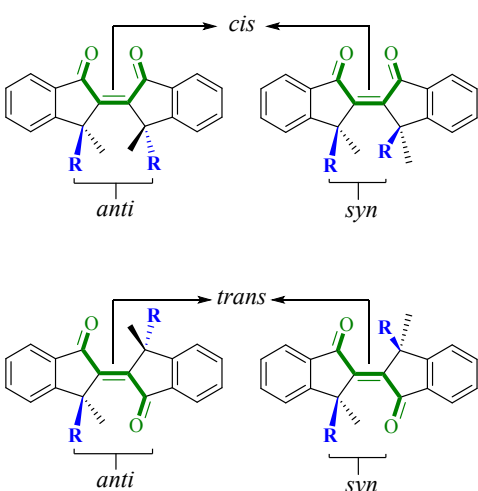

**Figure S1.** Possible isomers depending on the relative positions of the carbonyl groups and the equivalent substituents.

#### Criteria for the definition of the active space:

Based on the hydrogen migration involved in the Norrish type II reaction, we can classify the PES in the FC zone, TS zone and Product zone. In order to keep an active space with reasonable size that allow calculation times accessible, instead of increasing the active space, we have chosen the most important molecular orbitals to describe the electronic nature of the excited states depending on the zone of the PES that we were exploring.

We have used an active space (14,12) in all the calculations. However, they also were adapted to the PES zone according to Figure S3.

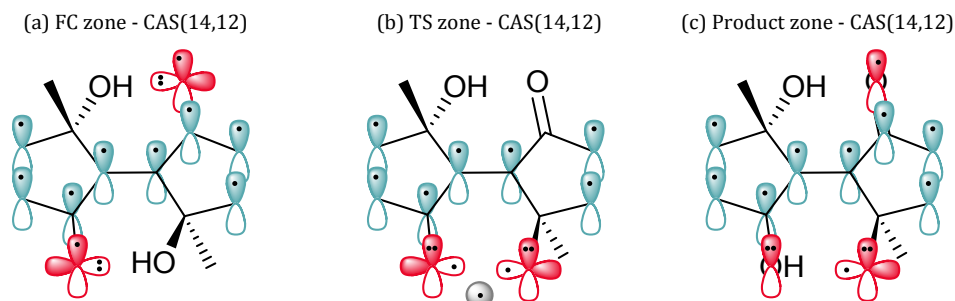

**Figure S2.** The active spaces used to study the hydrogen migration on BID-II derivatives

Initially, to study the transition state zone we included the  $\pi$  and  $\pi^*$  of the carbonyl group obtaining a CAS(16,14). We also tried with the CAS(14,12) as shown in Figure S3b, which lead to the same qualitatively results for the target states, so we decided to use the last active space mentioned in order to decrease the computation time.

The ideal situation would be to calculate the whole stationary points using CAS(16,14) such as in the transition state zone. Nevertheless, the molecular symmetry in the Franck-Condon geometry compels to include also the  $n$  on the other carbonyl plus the  $\sigma$ ,  $\sigma^*$  and  $P_O$  orbitals of the other HO group. This leads to an increase of the active space to (22,18) which is unaffordable with computation tools currently available in our group.

### DDCI Space

This space was defined based in computational affordability and similar size of the configuration space in Model 1 and 2. Once it was confirmed that all relevant valence MO were included, we additionally included the maximum number of empty MO as long as the CPU time was accessible.

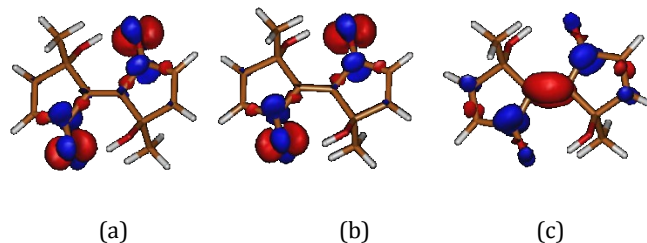

**Figure S3.** The electronic density differences between ground state and: (a) (Ag)1nπ\*, (b) (Au)1nπ\* and (c) (Au)1nπ\* at Franck-Condon geometry. Negative and positive differences are shown in red and blue, respectively.

| Irred. Rep.    | Nature           | $\Delta\Delta E(\text{B2 B2-Mod})$ |                              |                             |
|----------------|------------------|------------------------------------|------------------------------|-----------------------------|
|                |                  | $\Delta\Delta E$ (CASSCF)          | $\Delta\Delta E$ (MS-CASPT2) | $\Delta\Delta E$ (IDDCI+DC) |
| A <sub>g</sub> | <sup>3</sup> nπ* | -2.1 T <sub>2</sub>                | +4.7 T <sub>1</sub>          | +6.4 T <sub>1</sub>         |
|                | <sup>1</sup> nπ* | -1.8 S <sub>1</sub>                | +1.7 S <sub>1</sub>          | +6.8 S <sub>1</sub>         |
| A <sub>u</sub> | <sup>3</sup> ππ* | -5.5 T <sub>1</sub>                | +1.8 T <sub>2</sub>          | +3.6 T <sub>2</sub>         |
|                | <sup>1</sup> ππ* | -2.0 S <sub>5</sub>                | +11.9 S <sub>3</sub>         | +3.4 S <sub>2</sub>         |
| A <sub>u</sub> | <sup>3</sup> nπ* | -4.2 T <sub>3</sub>                | +3.2 T <sub>3</sub>          | +6.8 T <sub>3</sub>         |
|                | <sup>1</sup> nπ* | -3.1 S <sub>2</sub>                | +0.1 S <sub>2</sub>          | +6.5 S <sub>3</sub>         |

**Table S1.** Excitation energy differences between Model-2 and Model-1 for the lower singlet and triplet states at FC geometry.

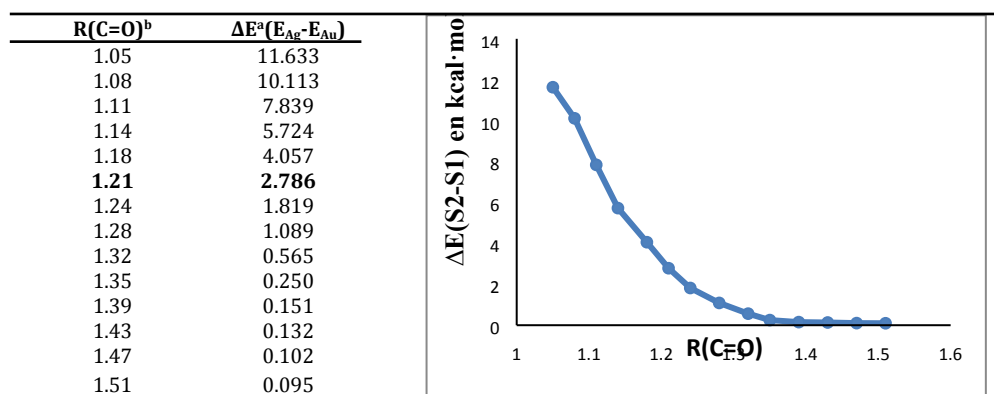

<sup>a</sup> Energies calculated at SA3-CASSCF(14,12) level.

<sup>b</sup> C=O distances (in Å) along symmetrical stretching.

**Figure S4.** The S<sub>1</sub>-S<sub>2</sub> energy gap in kcal·mol<sup>-1</sup> at the SA3-CASSCF(14,12) level in B2-Mod.

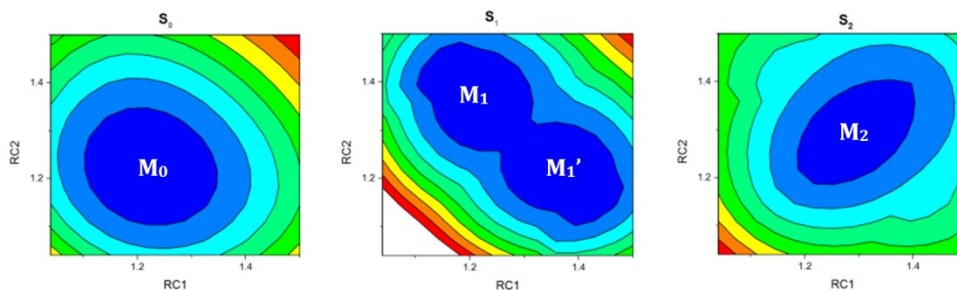

**Figure S5.** Contour diagrams calculated at CASSCF(14,12) level for the  $S_0$ ,  $S_1$  and  $S_2$  PES for Model-1. RC1 and RC2 are the linear direction from FC to both mirror-image  $\text{Min}^{-1}n\pi^*(S_1)$ .  $M_i$  means minimum on the  $S_i$ .

Figure S6 shows all the stationary points located around the FC geometry on the  $S_1$  and  $T_1$  PESs. The  $3N-6$  dimensional nuclear configuration space is projected into a 2D space formed by the two carbonyl distances.

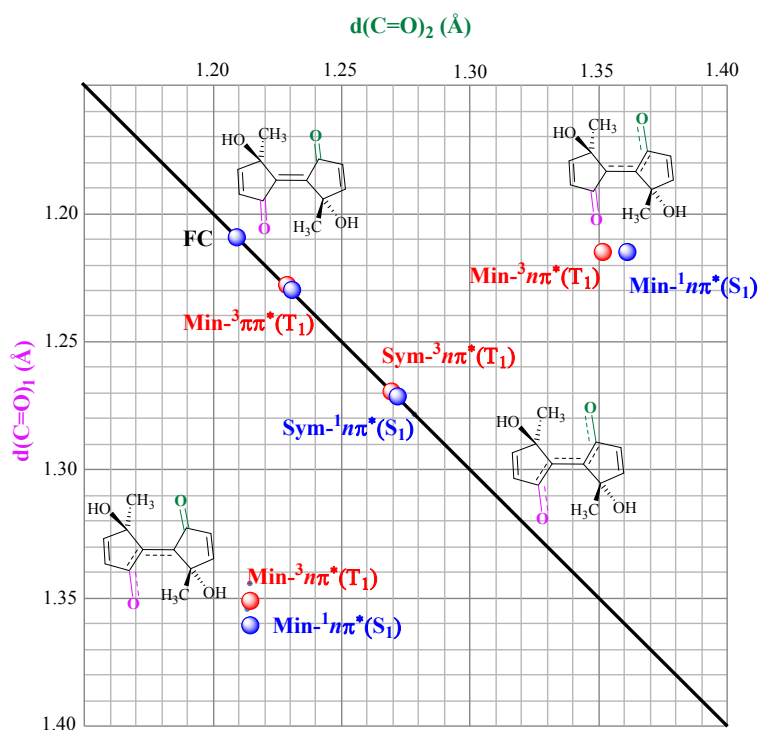

**Figure S6.** Stationary point located at CASSCF(14,12) on  $S_1$  and  $T_1$  in Model-1.

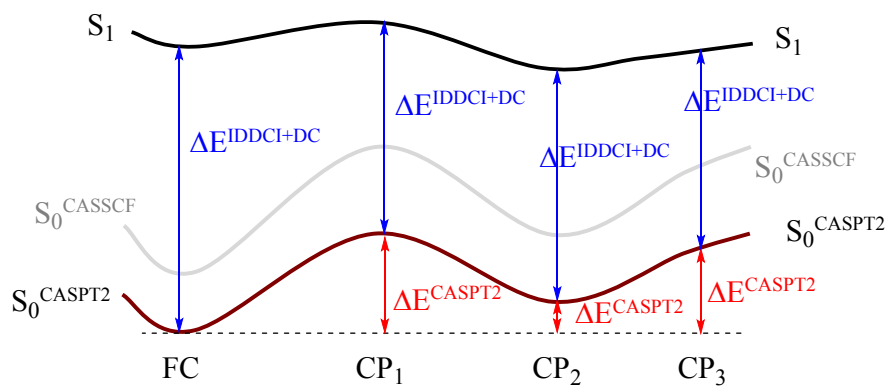

**Figure S7.** Graphical representation of the strategy used to get energy profiles at IDDCI+DC level. CP $i$  means critical point  $i$ .

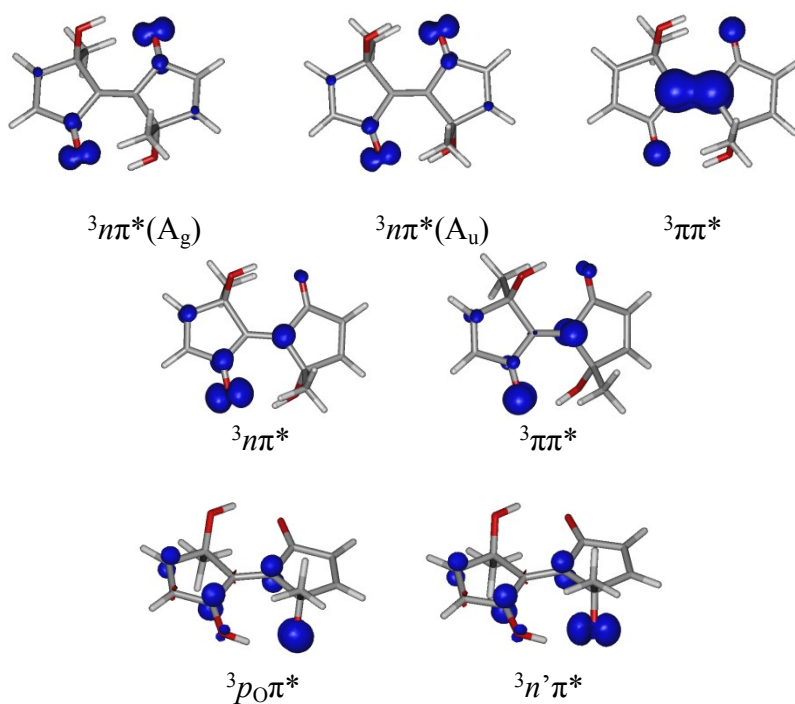

**Figure S8.** The spin density for the triplet states on the FC (first row), LM- $^1n\pi^*(S_1)$  (second row) and  $^3P(p_0\pi^*)$  (third row).

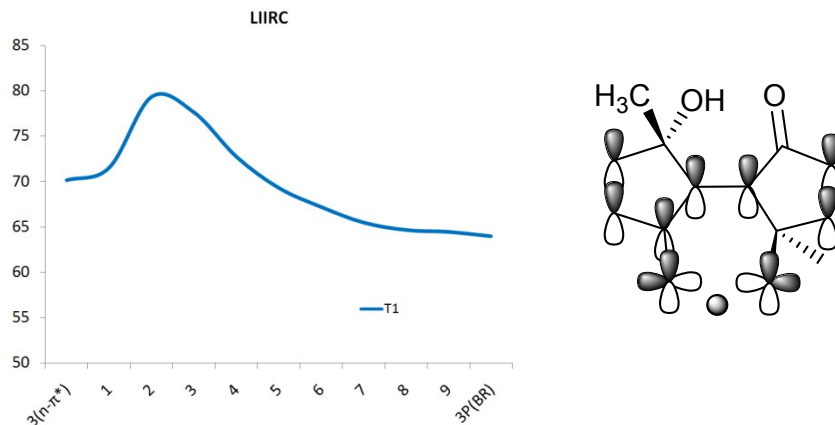

| MS2-CASPT2 | LM- ${}^3n\pi^*$ | 1    | 2    | 3    | 4    | 5    | 6    | 7    | 8    | 9    | ${}^3P(\rho_0\pi^*)$ |
|------------|------------------|------|------|------|------|------|------|------|------|------|----------------------|
| T1         | 70.2             | 71.6 | 79.4 | 77.7 | 72.8 | 69.3 | 67.2 | 65.5 | 64.6 | 64.4 | 64.0                 |

**Figure S9.** MS-CASPT2 energy profile along the coordinate connecting LM- ${}^3n\pi^*(T_1)$  and  ${}^3P(\rho_0\pi^*)$ .

zmat angstroms

```

c
c 1 cc2
c 2 cc3      1 ccc3
c 3 cc4      2 ccc4      1 dih4
c 4 cc5      3 ccc5      2 dih5
c 2 cc6      3 ccc6      4 dih6
o 2 oc7      3 occ7      4 dih7
o 5 oc8      4 occ8      3 dih8
c 1 cc9      2 ccc9      6 dih9
c 9 cc10     1 ccc10     2 dih10
c 10 cc11    9 ccc11     1 dih11
c 11 cc12    10 ccc12    9 dih12
c 12 cc13    11 ccc13    10 dih13
c 10 cc14    9 ccc14    13 dih14
o 10 oc15    9 occ15    13 dih15
o 13 oc16    9 occ16    10 dih16

```

variables:

|      | For ${}^3P(\rho_0\pi^*)$ |      | For the $S_0$ -FC |      | Differences |
|------|--------------------------|------|-------------------|------|-------------|
| cc2  | 1.533364                 | cc2  | 1.543617          | cc2  | -0.010253   |
| cc3  | 1.514532                 | cc3  | 1.514452          | cc3  | 0.000080    |
| ccc3 | 103.425                  | ccc3 | 102.091           | ccc3 | 1.334       |
| cc4  | 1.337265                 | cc4  | 1.338301          | cc4  | -0.001036   |
| ccc4 | 112.237                  | ccc4 | 113.698           | ccc4 | -1.461      |
| dih4 | -6.464                   | dih4 | -6.645            | dih4 | 0.181       |
| cc5  | 1.481690                 | cc5  | 1.473990          | cc5  | 0.007700    |
| ccc5 | 109.877                  | ccc5 | 109.740           | ccc5 | 0.137       |
| dih5 | 1.624                    | dih5 | 1.751             | dih5 | -0.127      |
| cc6  | 1.539062                 | cc6  | 1.533621          | cc6  | 0.005441    |
| ccc6 | 110.853                  | ccc6 | 109.773           | ccc6 | 1.08        |
| dih6 | 115.806                  | dih6 | 112.804           | dih6 | 3.002       |
| oc7  | 1.401832                 | oc7  | 1.395207          | oc7  | 0.006625    |
| occ7 | 110.488                  | occ7 | 106.620           | occ7 | 3.868       |
| dih7 | -127.841                 | dih7 | -126.425          | dih7 | -1.416      |
| oc8  | 1.212674                 | oc8  | 1.210367          | oc8  | 0.002307    |
| occ8 | 123.906                  | occ8 | 125.262           | occ8 | -1.356      |
| dih8 | -175.233                 | dih8 | -175.218          | dih8 | -0.015      |

|       |          |       |          |       |           |
|-------|----------|-------|----------|-------|-----------|
| cc9   | 1.386222 | cc9   | 1.351774 | cc9   | 0.034448  |
| ccc9  | 127.237  | ccc9  | 128.133  | ccc9  | -0.896    |
| dih9  | 67.239   | dih9  | 72.858   | dih9  | -5.619    |
| cc10  | 1.555429 | cc10  | 1.543617 | cc10  | 0.011812  |
| ccc10 | 125.638  | ccc10 | 128.133  | ccc10 | -2.495    |
| dih10 | -176.166 | dih10 | 180.000  | dih10 | 3.834     |
| cc11  | 1.512739 | cc11  | 1.514452 | cc11  | -0.001713 |
| ccc11 | 102.446  | ccc11 | 102.091  | ccc11 | 0.355     |
| dih11 | 170.368  | dih11 | 169.581  | dih11 | 0.787     |
| cc12  | 1.352453 | cc12  | 1.338301 | cc12  | 0.014152  |
| ccc12 | 110.787  | ccc12 | 113.698  | ccc12 | -2.911    |
| dih12 | 7.781    | dih12 | 6.645    | dih12 | 1.136     |
| cc13  | 1.436864 | cc13  | 1.473990 | cc13  | -0.037126 |
| ccc13 | 109.491  | ccc13 | 109.740  | ccc13 | -0.249    |
| dih13 | -3.622   | dih13 | -1.751   | dih13 | -1.871    |
| cc14  | 1.536000 | cc14  | 1.533621 | cc14  | 0.002379  |
| ccc14 | 111.525  | ccc14 | 112.428  | ccc14 | -0.903    |
| dih14 | 107.614  | dih14 | 108.921  | dih14 | -1.307    |
| oc15  | 1.395025 | oc15  | 1.395207 | oc15  | -0.000182 |
| occ15 | 113.770  | occ15 | 113.920  | occ15 | -0.15     |
| dih15 | -125.342 | dih15 | -123.160 | dih15 | -2.182    |
| oc16  | 1.341229 | oc16  | 1.210367 | oc16  | 0.130862  |
| occ16 | 129.629  | occ16 | 127.622  | occ16 | 2.007     |
| dih16 | -174.954 | dih16 | -171.226 | dih16 | -3.728    |

**Table S2.** z-matrices for the heavy atoms of the S<sub>0</sub>-FC and the <sup>3</sup>P(*p*<sub>0</sub>π\*) fully optimized structures.

### Model-1

| FC |          |          | Sym- <sup>1</sup> π*(S <sub>1</sub> ) |   |          | Sym- <sup>3</sup> π*(T <sub>1</sub> ) |          |   |           |           |           |
|----|----------|----------|---------------------------------------|---|----------|---------------------------------------|----------|---|-----------|-----------|-----------|
| C  | -0.57749 | 0.35104  | 0.00996                               | C | -0.60247 | 0.34874                               | -0.03009 | C | -0.598308 | 0.346792  | -0.029199 |
| C  | -0.76368 | 1.88188  | -0.05797                              | C | -0.77576 | 1.88466                               | -0.12614 | C | -0.774467 | 1.882798  | -0.123897 |
| C  | -1.95893 | -0.24793 | 0.06105                               | C | -1.92964 | -0.20275                              | -0.01066 | C | -1.931566 | -0.20788  | -0.009197 |
| C  | -2.25884 | 2.01088  | -0.26149                              | C | -2.26824 | 2.03665                               | -0.32332 | C | -2.267087 | 2.032541  | -0.32167  |
| C  | -2.91593 | 0.84832  | -0.17354                              | C | -2.91015 | 0.86077                               | -0.21530 | C | -2.909762 | 0.857621  | -0.215392 |
| C  | -0.35542 | 2.57937  | 1.24542                               | C | -0.36273 | 2.59267                               | 1.17132  | C | -0.360826 | 2.591087  | 1.173035  |
| H  | -2.69387 | 2.97648  | -0.43631                              | H | -2.71035 | 2.99918                               | -0.48993 | C | 0.598308  | -0.346792 | 0.029199  |
| H  | -3.97260 | 0.68266  | -0.24928                              | H | -3.96535 | 0.67955                               | -0.26926 | C | 0.774467  | -1.882798 | 0.123897  |
| H  | -0.86947 | 2.14780  | 2.09766                               | H | -0.90721 | 2.19033                               | 2.01818  | C | 1.931566  | 0.20788   | 0.009197  |
| H  | 0.71096  | 2.50283  | 1.41206                               | H | 0.69623  | 2.48635                               | 1.36673  | C | 2.267087  | -2.032541 | 0.32167   |
| H  | -0.61314 | 3.63134  | 1.18243                               | H | -0.58590 | 3.65103                               | 1.08638  | C | 2.909762  | -0.857621 | 0.215392  |
| H  | 0.78552  | 2.43976  | -1.04842                              | H | 0.78932  | 2.49616                               | -1.09165 | C | 0.360826  | -2.591087 | -1.173035 |
| O  | -2.25626 | -1.40315 | 0.26611                               | O | -2.27131 | -1.41782                              | 0.15643  | H | -2.709594 | 2.995159  | -0.48727  |
| O  | -0.15747 | 2.47691  | -1.16479                              | O | -0.14642 | 2.45105                               | -1.23963 | H | -3.964941 | 0.677262  | -0.271558 |
| C  | 0.57749  | -0.35104 | -0.00996                              | C | 0.60247  | -0.34874                              | 0.03009  | H | -0.904244 | 2.188486  | 2.020445  |
| C  | 0.76368  | -1.88188 | 0.05797                               | C | 0.77576  | -1.88466                              | 0.12614  | H | 0.698398  | 2.485371  | 1.36748   |
| C  | 1.95893  | 0.24793  | -0.06105                              | C | 1.92964  | 0.20275                               | 0.01066  | H | -0.584566 | 3.649345  | 1.088181  |
| C  | 2.25884  | -2.01088 | 0.26149                               | C | 2.26824  | -2.03665                              | 0.32332  | H | 0.789687  | 2.49279   | -1.090737 |
| C  | 2.91593  | -0.84832 | 0.17354                               | C | 2.91015  | -0.86077                              | 0.21530  | H | 2.709594  | -2.995159 | 0.48727   |
| C  | 0.35542  | -2.57937 | -1.24542                              | C | 0.36273  | -2.59267                              | -1.17132 | H | 3.964941  | -0.677262 | 0.271558  |
| H  | 2.69387  | -2.97648 | 0.43631                               | H | 2.71035  | -2.99918                              | 0.48993  | H | 0.904244  | -2.188486 | -2.020445 |
| H  | 3.97260  | -0.68266 | 0.24928                               | H | 3.96535  | -0.67955                              | 0.26926  | H | -0.698398 | -2.485371 | -1.36748  |
| H  | 0.86947  | -2.14780 | -2.09766                              | H | 0.90721  | -2.19033                              | -2.01818 | H | 0.584566  | -3.649345 | -1.088181 |
| H  | -0.71096 | -2.50283 | -1.41206                              | H | -0.69623 | -2.48635                              | -1.36673 | H | -0.789687 | -2.49279  | 1.090737  |
| H  | 0.61314  | -3.63134 | -1.18243                              | H | 0.58590  | -3.65103                              | -1.08638 | O | -2.271981 | -1.418734 | 0.158624  |
| H  | -0.78552 | -2.43976 | 1.04842                               | H | -0.78932 | -2.49616                              | 1.09165  | O | -0.146445 | 2.449916  | -1.237591 |
| O  | 2.25626  | 1.40315  | -0.26611                              | O | 2.27131  | 1.41782                               | -0.15643 | O | 2.271981  | 1.418734  | -0.158624 |
| O  | 0.15747  | -2.47691 | 1.16479                               | O | 0.14642  | -2.45105                              | 1.23963  | O | 0.146445  | -2.449916 | 1.237591  |

| Min- ${}^3\pi\pi^*(T_1)$ |          |          |          |
|--------------------------|----------|----------|----------|
| C                        | -0.71770 | -0.25240 | 0.00250  |
| C                        | -1.96980 | 0.62570  | 0.03660  |
| C                        | -1.13140 | -1.63700 | -0.03010 |
| C                        | -3.06520 | -0.40810 | 0.21350  |
| C                        | -2.60450 | -1.66210 | 0.13740  |
| C                        | -2.19233 | 1.39017  | -1.27461 |
| H                        | -4.08453 | -0.10335 | 0.35098  |
| H                        | -3.16270 | -2.57589 | 0.19163  |
| H                        | -3.14663 | 1.90381  | -1.22603 |
| H                        | -1.41928 | 2.12955  | -1.43591 |
| H                        | -2.20731 | 0.71365  | -2.12246 |
| H                        | -1.37840 | 2.18630  | 0.99270  |
| O                        | -0.42084 | -2.62555 | -0.18530 |
| O                        | -2.00347 | 1.48575  | 1.13825  |
| C                        | 0.71770  | 0.25240  | -0.00250 |
| C                        | 1.96980  | -0.62570 | -0.03660 |
| C                        | 1.13140  | 1.63700  | 0.03010  |
| C                        | 3.06520  | 0.40810  | -0.21350 |
| C                        | 2.60450  | 1.66210  | -0.13740 |
| C                        | 2.19233  | -1.39017 | 1.27461  |
| H                        | 4.08453  | 0.10335  | -0.35098 |
| H                        | 3.16270  | 2.57589  | -0.19163 |
| H                        | 3.14663  | -1.90381 | 1.22603  |
| H                        | 1.41928  | -2.12955 | 1.43591  |
| H                        | 2.20731  | -0.71365 | 2.12246  |
| H                        | 1.37840  | -2.18630 | -0.99270 |
| O                        | 0.42084  | 2.62555  | 0.18530  |
| O                        | 2.00347  | -1.48575 | -1.13825 |

| Min- ${}^1\eta\pi^*(S_1)$ |          |          |          |
|---------------------------|----------|----------|----------|
| C                         | -2.12089 | 0.93031  | -0.62302 |
| C                         | -2.30054 | 2.45180  | -0.76084 |
| C                         | -3.47378 | 0.33459  | -0.57246 |
| C                         | -3.79181 | 2.57705  | -0.99716 |
| C                         | -4.44163 | 1.41624  | -0.86084 |
| C                         | -1.21642 | -1.93686 | -1.92558 |
| C                         | -1.92032 | 3.22206  | 0.50994  |
| C                         | -0.74526 | -1.32372 | -0.59927 |
| C                         | 0.75440  | -1.49666 | -0.47903 |
| C                         | 1.38715  | -0.30167 | -0.53779 |
| C                         | 0.38708  | 0.73047  | -0.62022 |
| C                         | -0.91441 | 0.22459  | -0.60093 |
| H                         | 1.20685  | -2.46458 | -0.39948 |
| H                         | 2.44332  | -0.11845 | -0.51198 |
| H                         | -4.22562 | 3.53469  | -1.21370 |
| H                         | -5.49656 | 1.23955  | -0.93620 |
| H                         | -0.99838 | -2.99943 | -1.92112 |
| H                         | -2.28216 | -1.81380 | -2.06379 |
| H                         | -0.70461 | -1.48062 | -2.76598 |
| H                         | -2.46477 | 2.84093  | 1.36615  |
| H                         | -0.86180 | 3.14703  | 0.72724  |
| H                         | -2.16611 | 4.27153  | 0.38316  |
| H                         | -2.28377 | -1.87513 | 0.40667  |
| H                         | -0.75673 | 3.19075  | -1.70715 |
| O                         | 0.75351  | 2.04125  | -0.66860 |
| O                         | -3.77921 | -0.81431 | -0.32262 |
| O                         | -1.34001 | -1.95053 | 0.49473  |
| O                         | -1.66384 | 2.98967  | -1.89129 |

| Min- ${}^3\eta\pi^*(T_1)$ |          |          |          |
|---------------------------|----------|----------|----------|
| C                         | -2.11858 | 0.93639  | -0.62357 |
| C                         | -2.29948 | 2.45775  | -0.75639 |
| C                         | -3.47545 | 0.33606  | -0.57628 |
| C                         | -3.79053 | 2.57955  | -0.99545 |
| C                         | -4.44093 | 1.41764  | -0.86512 |
| C                         | -1.22431 | -1.93349 | -1.92705 |
| C                         | -1.92326 | 3.22641  | 0.51681  |
| C                         | -0.74523 | -1.31859 | -0.60389 |
| C                         | 0.75556  | -1.48651 | -0.49330 |
| C                         | 1.38820  | -0.29291 | -0.53902 |
| C                         | 0.39203  | 0.74260  | -0.62545 |
| C                         | -0.91443 | 0.22771  | -0.61039 |
| H                         | 1.20831  | -2.45420 | -0.40943 |
| H                         | 2.44401  | -0.10953 | -0.50474 |
| H                         | -4.22522 | 3.53662  | -1.21276 |
| H                         | -5.49563 | 1.24174  | -0.94499 |
| H                         | -1.00035 | -2.99479 | -1.92337 |
| H                         | -2.29167 | -1.81686 | -2.05632 |
| H                         | -0.72113 | -1.47569 | -2.77187 |
| H                         | -2.46085 | 2.83793  | 1.37454  |
| H                         | -0.86318 | 3.16260  | 0.73029  |
| H                         | -2.17787 | 4.27375  | 0.39296  |
| H                         | -2.27530 | -1.87134 | 0.41233  |
| H                         | -0.72943 | 3.05539  | -1.74112 |
| O                         | 0.73940  | 2.04911  | -0.62252 |
| O                         | -3.77504 | -0.81342 | -0.32564 |
| O                         | -1.33060 | -1.94716 | 0.49388  |
| O                         | -1.66535 | 2.99998  | -1.88331 |

| ${}^3P(\rho_0\pi^*)$ |          |          |          |
|----------------------|----------|----------|----------|
| C                    | -2.18615 | 0.94423  | -0.67205 |
| C                    | -2.32842 | 2.49029  | -0.76595 |
| C                    | -3.51041 | 0.43948  | -0.62751 |
| C                    | -3.81363 | 2.66790  | -0.99176 |
| C                    | -4.46375 | 1.48951  | -0.85802 |
| C                    | -1.26061 | -1.96640 | -1.94590 |
| C                    | -1.93566 | 3.17349  | 0.55249  |
| C                    | -0.80832 | -1.27975 | -0.64488 |
| C                    | 0.68112  | -1.45414 | -0.43286 |
| C                    | 1.33695  | -0.28923 | -0.46687 |
| C                    | 0.37838  | 0.82295  | -0.66587 |
| C                    | -0.99067 | 0.24271  | -0.65460 |
| H                    | 1.10754  | -2.43167 | -0.30859 |
| H                    | 2.39332  | -0.12587 | -0.38273 |
| H                    | -4.24226 | 3.63531  | -1.16236 |
| H                    | -5.52087 | 1.31630  | -0.90889 |
| H                    | -1.04861 | -3.02925 | -1.89872 |
| H                    | -2.31850 | -1.82579 | -2.11519 |
| H                    | -0.71268 | -1.54102 | -2.77709 |
| H                    | -2.50761 | 2.77022  | 1.38117  |
| H                    | -0.88233 | 3.04982  | 0.76669  |
| H                    | -2.14139 | 4.23588  | 0.47549  |
| H                    | -3.29790 | -1.33247 | 0.02263  |
| H                    | -0.72178 | 3.01881  | -1.67558 |
| O                    | 0.70710  | 1.98026  | -0.81800 |
| O                    | -3.94086 | -0.81897 | -0.45450 |
| O                    | -1.52711 | -1.91439 | 0.37772  |
| O                    | -1.65501 | 3.05205  | -1.85086 |

| ${}^1G(n'\pi^*)$ |          |          |          |
|------------------|----------|----------|----------|
| C                | -2.17761 | 0.95351  | -0.70514 |
| C                | -2.32839 | 2.49798  | -0.76929 |
| C                | -3.49868 | 0.43874  | -0.65247 |
| C                | -3.81734 | 2.66893  | -0.97991 |
| C                | -4.46089 | 1.48386  | -0.85243 |
| C                | -1.24431 | -1.97267 | -1.97144 |
| C                | -1.92951 | 3.15953  | 0.55840  |
| C                | -0.82734 | -1.27109 | -0.67563 |
| C                | 0.65701  | -1.45342 | -0.41280 |
| C                | 1.32240  | -0.29286 | -0.44962 |
| C                | 0.38251  | 0.82665  | -0.68801 |
| C                | -0.98724 | 0.24923  | -0.71092 |
| H                | 1.07604  | -2.43144 | -0.27294 |
| H                | 2.37999  | -0.14565 | -0.35130 |
| H                | -4.25400 | 3.63520  | -1.13586 |
| H                | -5.51770 | 1.30673  | -0.89512 |
| H                | -1.02002 | -3.03164 | -1.89815 |
| H                | -2.30424 | -1.85669 | -2.14897 |
| H                | -0.70333 | -1.55828 | -2.81419 |
| H                | -2.49058 | 2.73709  | 1.38497  |
| H                | -0.87333 | 3.03938  | 0.76071  |
| H                | -2.14315 | 4.22162  | 0.50278  |
| H                | -3.39386 | -1.30431 | 0.14168  |
| H                | -0.72846 | 3.03861  | -1.68410 |
| O                | 0.71942  | 1.98048  | -0.84492 |
| O                | -3.90379 | -0.83873 | -0.51217 |
| O                | -1.48007 | -1.84271 | 0.42185  |
| O                | -1.66367 | 3.08223  | -1.84759 |

| ${}^3G(n'\pi^*)$ |          |          |          |
|------------------|----------|----------|----------|
| C                | -2.17167 | 0.95030  | -0.68553 |
| C                | -2.32480 | 2.49468  | -0.76351 |
| C                | -3.49822 | 0.43426  | -0.63624 |
| C                | -3.81048 | 2.66234  | -0.99412 |
| C                | -4.45382 | 1.47604  | -0.86792 |
| C                | -1.26294 | -1.96640 | -1.95563 |
| C                | -1.93859 | 3.16686  | 0.56216  |
| C                | -0.82195 | -1.26826 | -0.66714 |
| C                | 0.66860  | -1.45337 | -0.43486 |
| C                | 1.33477  | -0.29392 | -0.46889 |
| C                | 0.39159  | 0.82921  | -0.67894 |
| C                | -0.97966 | 0.25434  | -0.68831 |
| H                | 1.09084  | -2.43279 | -0.31424 |
| H                | 2.39351  | -0.14745 | -0.38361 |
| H                | -4.24759 | 3.62730  | -1.15646 |
| H                | -5.50987 | 1.29787  | -0.92354 |
| H                | -1.04305 | -3.02714 | -1.88891 |
| H                | -2.32443 | -1.84595 | -2.11943 |
| H                | -0.73215 | -1.55563 | -2.80696 |
| H                | -2.50773 | 2.75123  | 1.38662  |
| H                | -0.88441 | 3.04726  | 0.77548  |
| H                | -2.15103 | 4.22860  | 0.49592  |
| H                | -3.39846 | -1.33988 | 0.10084  |
| H                | -0.71613 | 3.03516  | -1.66446 |
| O                | 0.72811  | 1.98497  | -0.82045 |
| O                | -3.92072 | -0.84048 | -0.51327 |
| O                | -1.47051 | -1.81799 | 0.44923  |
| O                | -1.64937 | 3.06912  | -1.84040 |



| ${}^1P(n^*\pi^*)$ |          |          |          |
|-------------------|----------|----------|----------|
| C                 | -2.15634 | 0.95311  | -0.73652 |
| C                 | -2.32596 | 2.49676  | -0.73990 |
| C                 | -3.46253 | 0.41769  | -0.67889 |
| C                 | -3.82825 | 2.66010  | -0.83635 |
| C                 | -4.44868 | 1.45584  | -0.75757 |
| C                 | -1.14858 | -0.20426 | -1.90068 |
| C                 | -1.83692 | 3.11977  | 0.57536  |
| C                 | -0.78057 | -1.26336 | -0.63071 |
| C                 | 0.71069  | -1.39397 | -0.36064 |
| C                 | 1.35803  | -0.22965 | -0.49036 |
| C                 | 0.39626  | 0.85212  | -0.80019 |
| C                 | -0.96193 | 0.25421  | -0.75500 |
| H                 | 1.14791  | -2.35174 | -0.15225 |
| H                 | 2.41392  | -0.06852 | -0.41385 |
| H                 | -4.28848 | 3.62429  | -0.91838 |
| H                 | -5.50926 | 1.28166  | -0.76662 |
| H                 | -0.88746 | -3.08521 | -1.77073 |
| H                 | -2.20684 | -1.97222 | -2.10106 |
| H                 | -0.60325 | -1.64809 | -2.75203 |
| H                 | -2.32659 | 2.66002  | 1.42716  |
| H                 | -0.76710 | 3.01025  | 0.69276  |
| H                 | -2.06745 | 4.17983  | 0.57277  |
| H                 | -4.63609 | -1.04959 | -0.37395 |
| H                 | -0.80621 | 3.04237  | -1.77705 |
| O                 | 0.70835  | 1.99605  | -1.05792 |
| O                 | -3.73745 | -0.90035 | -0.63564 |
| O                 | -1.40814 | -1.81652 | 0.48056  |
| O                 | -1.75121 | 3.12568  | -1.84492 |

| ${}^3P(n^*\pi^*)$ |          |          |          |
|-------------------|----------|----------|----------|
| C                 | -2.15372 | 0.94881  | -0.72963 |
| C                 | -2.32359 | 2.49354  | -0.73396 |
| C                 | -3.46429 | 0.41566  | -0.68115 |
| C                 | -3.82404 | 2.65908  | -0.84014 |
| C                 | -4.44643 | 1.45712  | -0.76688 |
| C                 | -1.16255 | -2.05392 | -1.87069 |
| C                 | -1.84117 | 3.11707  | 0.58364  |
| C                 | -0.76598 | -1.26052 | -0.61872 |
| C                 | 0.73185  | -1.38884 | -0.38709 |
| C                 | 1.37190  | -0.22103 | -0.51493 |
| C                 | 0.39945  | 0.85972  | -0.79605 |
| C                 | -0.95754 | 0.25645  | -0.74147 |
| H                 | 1.17369  | -2.34710 | -0.19076 |
| H                 | 2.42763  | -0.04336 | -0.45325 |
| H                 | -4.28193 | 3.62457  | -0.92058 |
| H                 | -5.50740 | 1.28490  | -0.78348 |
| H                 | -0.88548 | -3.09466 | -1.74143 |
| H                 | -2.22560 | -1.99713 | -2.04492 |
| H                 | -0.64189 | -1.65899 | -2.73580 |
| H                 | -2.33744 | 2.65932  | 1.43268  |
| H                 | -0.77239 | 3.00516  | 0.70809  |
| H                 | -2.06943 | 4.17767  | 0.57841  |
| H                 | -4.67607 | -1.03293 | -0.46675 |
| H                 | -0.79912 | 3.04756  | -1.76044 |
| O                 | 0.70723  | 2.00726  | -1.04296 |
| O                 | -3.75476 | -0.89883 | -0.64339 |
| O                 | -1.38704 | -1.81901 | 0.49571  |
| O                 | -1.74404 | 3.12272  | -1.83667 |

| ${}^1P(Epoxy)$ |           |           |           |
|----------------|-----------|-----------|-----------|
| C              | -2.184373 | 0.991333  | -0.9409   |
| C              | -2.327589 | 2.526685  | -0.78238  |
| C              | -3.448177 | 0.499179  | -0.895901 |
| C              | -3.801383 | 2.738611  | -1.061318 |
| C              | -4.44754  | 1.566716  | -1.063574 |
| C              | -1.434515 | -2.245199 | -1.691373 |
| C              | -2.053831 | 2.96937   | 0.667035  |
| C              | -0.683813 | -1.243704 | -0.847901 |
| C              | 0.815925  | -1.428784 | -0.806696 |
| C              | 1.436956  | -0.261351 | -0.59374  |
| C              | 0.438035  | 0.830178  | -0.555652 |
| C              | -0.948849 | 0.200481  | -0.659192 |
| H              | 1.278502  | -2.394098 | -0.888182 |
| H              | 2.48679   | -0.079519 | -0.475656 |
| H              | -4.213746 | 3.723407  | -1.16083  |
| H              | -5.498227 | 1.379532  | -1.165113 |
| H              | -1.405317 | -3.216571 | -1.205333 |
| H              | -2.460245 | -1.976152 | -1.976152 |
| H              | -0.930382 | -2.33875  | -2.647288 |
| H              | -2.68487  | 2.428487  | 1.362461  |
| H              | -1.021099 | 2.815566  | 0.948276  |
| H              | -2.2688   | 4.029042  | 0.75612   |
| H              | -3.265608 | -1.167395 | -0.041691 |
| H              | -0.675856 | 3.273758  | -1.42542  |
| O              | 0.703512  | 2.006302  | -0.548806 |
| O              | -3.881954 | -0.7515   | -0.634531 |
| O              | -1.146014 | -0.853751 | 0.413348  |
| O              | -1.587666 | 3.298403  | -1.684509 |

| ${}^1T^*(n^*\pi^*)$ |          |          |          |
|---------------------|----------|----------|----------|
| C                   | -2.17761 | 0.95351  | -0.70514 |
| C                   | -2.32839 | 2.49798  | -0.76929 |
| C                   | -3.49868 | 0.43874  | -0.65247 |
| C                   | -3.81734 | 2.66893  | -0.97991 |
| C                   | -4.46089 | 1.48386  | -0.85243 |
| C                   | -1.24431 | -1.97267 | -1.97144 |
| C                   | -1.92951 | 3.15953  | 0.55840  |
| C                   | -0.82734 | -1.27109 | -0.67563 |
| C                   | 0.65701  | -1.45342 | -0.41280 |
| C                   | 1.32240  | -0.29286 | -0.44962 |
| C                   | 0.38251  | 0.82665  | -0.68801 |
| C                   | -0.98724 | 0.24923  | -0.71092 |
| H                   | 1.07604  | -2.43144 | -0.27294 |
| H                   | 2.37999  | -0.14565 | -0.35130 |
| H                   | -4.25400 | 3.63520  | -1.13586 |
| H                   | -5.51770 | 1.30673  | -0.89512 |
| H                   | -1.02002 | -3.03164 | -1.89815 |
| H                   | -2.30424 | -1.85669 | -2.14897 |
| H                   | -0.70333 | -1.55828 | -2.81419 |
| H                   | -2.49058 | 2.73709  | 1.38497  |
| H                   | -0.87333 | 3.03938  | 0.76071  |
| H                   | -2.14315 | 4.22162  | 0.50278  |
| H                   | -3.39386 | -1.30431 | 0.14168  |
| H                   | -0.72846 | 3.03861  | -1.68410 |
| O                   | 0.71942  | 1.98048  | -0.84492 |
| O                   | -3.90379 | -0.83873 | -0.51217 |
| O                   | -1.48007 | -1.84271 | 0.42185  |
| O                   | -1.66367 | 3.08223  | -1.84759 |

| ${}^3T^*(n^*\pi^*)$ |          |          |          |
|---------------------|----------|----------|----------|
| C                   | -2.17167 | 0.95030  | -0.68553 |
| C                   | -2.32480 | 2.49468  | -0.76351 |
| C                   | -3.49822 | 0.43426  | -0.63624 |
| C                   | -3.81048 | 2.66234  | -0.99412 |
| C                   | -4.45382 | 1.47604  | -0.86792 |
| C                   | -1.26294 | -1.96640 | -1.95563 |
| C                   | -1.93859 | 3.16686  | 0.56216  |
| C                   | -0.82195 | -1.26826 | -0.66714 |
| C                   | 0.66860  | -1.45337 | -0.43486 |
| C                   | 1.33477  | -0.29392 | -0.46889 |
| C                   | 0.39159  | 0.82921  | -0.67894 |
| C                   | -0.97966 | 0.25434  | -0.68831 |
| H                   | 1.09084  | -2.43280 | -0.31424 |
| H                   | 2.39351  | -0.14745 | -0.38361 |
| H                   | -4.24759 | 3.62730  | -1.15646 |
| H                   | -5.50987 | 1.29787  | -0.92354 |
| H                   | -1.04305 | -3.02714 | -1.88892 |
| H                   | -2.32443 | -1.84595 | -2.11944 |
| H                   | -0.73215 | -1.55563 | -2.80697 |
| H                   | -2.50773 | 2.75123  | 1.38662  |
| H                   | -0.88441 | 3.04726  | 0.77548  |
| H                   | -2.15103 | 4.22860  | 0.49592  |
| H                   | -3.39846 | -1.33988 | 0.10084  |
| H                   | -0.71613 | 3.03516  | -1.66446 |
| O                   | 0.72811  | 1.98497  | -0.82045 |
| O                   | -3.92072 | -0.84048 | -0.51327 |
| O                   | -1.47051 | -1.81799 | 0.44923  |
| O                   | -1.64937 | 3.06912  | -1.84040 |

| ${}^1P(EpoxyRot)$ |           |           |           |
|-------------------|-----------|-----------|-----------|
| C                 | -2.35949  | 0.63598   | -0.330648 |
| C                 | -2.48364  | 1.97568   | -1.06386  |
| C                 | -3.548985 | 0.336369  | 0.220752  |
| C                 | -3.956987 | 2.294701  | -0.893236 |
| C                 | -4.552123 | 1.366927  | -0.130708 |
| C                 | -0.859473 | -1.114821 | -2.654114 |
| C                 | -1.616781 | 3.07655   | -0.446407 |
| C                 | -0.432135 | -0.942964 | -1.223049 |
| C                 | 1.033882  | -0.973467 | -0.857445 |
| C                 | 1.24829   | -0.332225 | 0.304317  |
| C                 | -0.026663 | 0.252779  | 0.799692  |
| C                 | -1.109927 | -0.142915 | -0.19292  |
| H                 | 1.769633  | -1.501638 | -1.434411 |
| H                 | 2.172272  | -0.246031 | 0.842086  |
| H                 | -4.402726 | 3.169041  | -1.325651 |
| H                 | -5.580098 | 1.34563   | 0.181456  |
| H                 | -0.628999 | -2.124064 | -2.981101 |
| H                 | -1.921561 | -0.947489 | -2.760379 |
| H                 | -0.329643 | -0.424684 | -3.303056 |
| H                 | -1.809406 | 3.181646  | 0.613677  |
| H                 | -0.560212 | 2.851692  | -0.569466 |
| H                 | -1.81538  | 4.020726  | -0.942428 |
| H                 | -4.747228 | -0.802601 | 1.156067  |
| H                 | -1.28343  | 1.863664  | -2.588596 |
| O                 | -0.17000  | 0.948233  | 1.772759  |
| O                 | -3.81604  | -0.722541 | 1.005545  |
| O                 | -1.20329  | -1.604838 | -0.255518 |
| O                 | -2.22000  | 1.880932  | -2.445944 |

## Model-2

|   | FC       |          |          |
|---|----------|----------|----------|
| C | -5.29861 | 0.96873  | 0.10950  |
| C | 5.29861  | -0.96873 | -0.10950 |
| C | -4.07783 | 1.59946  | -0.03530 |
| C | 4.07783  | -1.59946 | 0.03530  |
| C | -2.93112 | 0.80161  | -0.07986 |
| C | 2.93112  | -0.80161 | 0.07986  |
| C | -2.98929 | -0.56523 | 0.00186  |
| C | 2.98929  | 0.56523  | -0.00186 |
| C | -4.21702 | -1.20765 | 0.15959  |
| C | 4.21702  | 1.20765  | -0.15959 |
| C | -5.36313 | -0.43170 | 0.21156  |
| C | 5.36313  | 0.43170  | -0.21156 |
| C | -1.62362 | -1.21934 | -0.10996 |
| C | 1.62362  | 1.21934  | 0.10996  |
| C | -1.52978 | 1.23693  | -0.18379 |
| C | 1.52978  | -1.23693 | 0.18379  |
| C | -0.67024 | 0.00151  | -0.06780 |
| C | 0.67024  | -0.00151 | 0.06780  |
| C | -1.50847 | -1.97487 | -1.44149 |
| C | 1.50847  | 1.97487  | 1.44149  |
| H | -6.20395 | 1.54642  | 0.15278  |
| H | 6.20395  | -1.54642 | -0.15278 |
| H | -3.99900 | 2.66847  | -0.10398 |
| H | 3.99900  | -2.66847 | 0.10398  |
| H | -4.26890 | -2.27621 | 0.25223  |
| H | 4.26890  | 2.27621  | -0.25223 |
| H | -6.32004 | -0.90601 | 0.33618  |
| H | 6.32004  | 0.90601  | -0.33618 |
| H | -0.53157 | -2.42815 | -1.54741 |
| H | 0.53157  | 2.42815  | 1.54741  |
| H | -2.25362 | -2.76191 | -1.47302 |
| H | 2.25362  | 2.76191  | 1.47302  |
| H | -1.67366 | -1.31071 | -2.28280 |
| H | 1.67366  | 1.31071  | 2.28280  |
| H | -0.65729 | -2.52647 | 0.91208  |
| H | 0.65729  | 2.52647  | -0.91208 |
| O | -1.16583 | 2.38264  | -0.33130 |
| O | 1.16583  | -2.38264 | 0.33130  |
| O | -1.49552 | -2.08193 | 0.97729  |
| O | 1.49552  | 2.08193  | -0.97729 |

|   | Min <sup>-1</sup> ηπ*(S <sub>i</sub> ) |          |          |
|---|----------------------------------------|----------|----------|
| C | -5.27946                               | 1.00927  | 0.21146  |
| C | -4.06381                               | 1.62237  | -0.01852 |
| C | -2.93291                               | 0.82090  | -0.09015 |
| C | -3.00171                               | -0.54757 | 0.04773  |
| C | -4.21810                               | -1.16625 | 0.28948  |
| C | -5.35086                               | -0.37548 | 0.36998  |
| C | -1.64282                               | -1.20501 | -0.12446 |
| C | -1.52382                               | 1.23238  | -0.27161 |
| C | -0.69706                               | 0.01034  | -0.16082 |
| C | -1.61240                               | -2.00114 | -1.43729 |
| C | 5.34023                                | -0.95933 | -0.00221 |
| C | 4.10856                                | -1.59635 | 0.02220  |
| C | 2.96289                                | -0.79481 | 0.00917  |
| C | 3.03928                                | 0.57589  | -0.01247 |
| C | 4.27589                                | 1.21094  | -0.04888 |
| C | 5.41741                                | 0.43824  | -0.04396 |
| C | 1.65984                                | 1.20778  | 0.02356  |
| C | 1.54705                                | -1.15367 | -0.02431 |
| C | 0.71572                                | -0.02416 | -0.08156 |
| C | 1.46354                                | 1.93627  | 1.36151  |
| H | -6.17639                               | 1.59788  | 0.27783  |
| H | -3.98424                               | 2.68788  | -0.13064 |
| H | -4.28033                               | -2.23018 | 0.42385  |
| H | -6.30469                               | -0.83388 | 0.56097  |
| H | -0.63978                               | -2.44424 | -1.61505 |
| H | -2.34794                               | -2.79720 | -1.39614 |
| H | -1.84734                               | -1.36032 | -2.27883 |
| H | -0.76194                               | -2.68355 | 0.80221  |
| H | 6.24367                                | -1.54162 | 0.00249  |
| H | 4.04236                                | -2.66876 | 0.04179  |
| H | 4.33707                                | 2.28257  | -0.09331 |
| H | 6.38220                                | 0.91171  | -0.07626 |
| H | 0.47356                                | 2.36678  | 1.43206  |
| H | 2.18633                                | 2.74053  | 1.43978  |
| H | 1.60693                                | 1.25910  | 2.19613  |
| H | 0.70647                                | 2.50454  | -1.02027 |
| O | -1.15400                               | 2.37186  | -0.47667 |
| O | -1.43583                               | -2.04255 | 0.98207  |
| O | 1.18560                                | -2.44778 | -0.03750 |
| O | 1.56083                                | 2.08658  | -1.05335 |

|   | Min <sup>-3</sup> ηπ*(T <sub>i</sub> ) |           |           |
|---|----------------------------------------|-----------|-----------|
| C | -5.27092                               | 1.003366  | 0.216967  |
| C | -4.056531                              | 1.618994  | -0.009471 |
| C | -2.924199                              | 0.818971  | -0.086205 |
| C | -2.990841                              | -0.550019 | 0.043077  |
| C | -4.20699                               | -1.171708 | 0.281234  |
| C | -5.340255                              | -0.382969 | 0.366664  |
| C | -1.632371                              | -1.207463 | -0.129063 |
| C | -1.517734                              | 1.234616  | -0.268412 |
| C | -0.683712                              | 0.008898  | -0.164162 |
| C | -1.602189                              | -2.00569  | -1.440374 |
| C | 5.324698                               | -0.975556 | -0.003263 |
| C | 4.08184                                | -1.602668 | 0.020805  |
| C | 2.945885                               | -0.796128 | 0.0103    |
| C | 3.031202                               | 0.5852    | -0.009778 |
| C | 4.264065                               | 1.210835  | -0.047308 |
| C | 5.416976                               | 0.420046  | -0.043215 |
| C | 1.652308                               | 1.219013  | 0.023489  |
| C | 1.542148                               | -1.143992 | -0.023573 |
| C | 0.70939                                | -0.017923 | -0.082217 |
| C | 1.452257                               | 1.947448  | 1.360484  |
| H | -6.168698                              | 1.590199  | 0.287268  |
| H | -3.97798                               | 2.685215  | -0.115337 |
| H | -4.267702                              | -2.236453 | 0.409087  |
| H | -6.29352                               | -0.84377  | 0.55472   |
| H | -0.63107                               | -2.452787 | -1.615994 |
| H | -2.339675                              | -2.799657 | -1.398808 |
| H | -1.833239                              | -1.365293 | -2.283592 |
| H | -0.701593                              | -2.625939 | 0.841151  |
| H | 6.220588                               | -1.569459 | 0.000323  |
| H | 4.005959                               | -2.674494 | 0.037187  |
| H | 4.333813                               | 2.281849  | -0.091771 |
| H | 6.384317                               | 0.887465  | -0.075222 |
| H | 0.462809                               | 2.378751  | 1.429695  |
| H | 2.176531                               | 2.750314  | 1.43951   |
| H | 1.594093                               | 1.270384  | 2.195503  |
| H | 0.702067                               | 2.513438  | -1.024477 |
| O | -1.152417                              | 2.374124  | -0.473691 |
| O | -1.435732                              | -2.04299  | 0.980243  |
| O | 1.170308                               | -2.428926 | -0.056769 |
| O | 1.556116                               | 2.094756  | -1.055006 |

| Min- $^3\pi\pi^*(T_1)$ |           |           |           | Sym- $^1\pi\pi^*(S_1)$ |           |           |           | Sym- $^3\pi\pi^*(T_1)$ |           |           |           |
|------------------------|-----------|-----------|-----------|------------------------|-----------|-----------|-----------|------------------------|-----------|-----------|-----------|
| C                      | -5.346174 | 0.97747   | 0.144532  | C                      | -5.308837 | 0.954704  | 0.167276  | C                      | -5.306657 | 0.95624   | 0.169083  |
| C                      | 5.346174  | -0.97747  | -0.144532 | C                      | 5.308837  | -0.954704 | -0.167276 | C                      | 5.306657  | -0.95624  | -0.169083 |
| C                      | -4.139763 | 1.604876  | 0.00699   | C                      | -4.1031   | 1.583414  | 0.025246  | C                      | -4.101487 | 1.585946  | 0.02866   |
| C                      | 4.139763  | -1.604876 | -0.00699  | C                      | 4.1031    | -1.583414 | -0.025246 | C                      | 4.101487  | -1.585946 | -0.02866  |
| C                      | -2.985442 | 0.80538   | -0.032315 | C                      | -2.947341 | 0.783656  | -0.010786 | C                      | -2.944737 | 0.787303  | -0.008206 |
| C                      | 2.985442  | -0.80538  | 0.032315  | C                      | 2.947341  | -0.783656 | 0.010786  | C                      | 2.944737  | -0.787303 | 0.008206  |
| C                      | -3.052261 | -0.563683 | 0.054102  | C                      | -3.017104 | -0.586946 | 0.0815    | C                      | -3.013142 | -0.583385 | 0.08195   |
| C                      | 3.052261  | 0.563683  | -0.054102 | C                      | 3.017104  | 0.586946  | -0.0815   | C                      | 3.013142  | 0.583385  | -0.08195  |
| C                      | -4.291851 | -1.20413  | 0.203754  | C                      | -4.254365 | -1.223707 | 0.237076  | C                      | -4.250558 | -1.221174 | 0.235827  |
| C                      | 4.291851  | 1.20413   | -0.203754 | C                      | 4.254365  | 1.223707  | -0.237076 | C                      | 4.250558  | 1.221174  | -0.235827 |
| C                      | -5.419368 | -0.429094 | 0.248163  | C                      | -5.384319 | -0.449856 | 0.279308  | C                      | -5.381118 | -0.448746 | 0.278584  |
| C                      | 5.419368  | 0.429094  | -0.248163 | C                      | 5.384319  | 0.449856  | -0.279308 | C                      | 5.381118  | 0.448746  | -0.278584 |
| C                      | -1.680718 | -1.205606 | -0.063681 | C                      | -1.644119 | -1.21907  | -0.034589 | C                      | -1.641223 | -1.217355 | -0.034722 |
| C                      | 1.680718  | 1.205606  | 0.063681  | C                      | 1.644119  | 1.21907   | 0.034589  | C                      | 1.641223  | 1.217355  | 0.034722  |
| C                      | -1.568562 | 1.223422  | -0.124474 | C                      | -1.5345   | 1.173949  | -0.096482 | C                      | -1.533604 | 1.181635  | -0.096556 |
| C                      | 1.568562  | -1.223422 | 0.124474  | C                      | 1.5345    | -1.173949 | 0.096482  | C                      | 1.533604  | -1.181635 | 0.096556  |
| C                      | -0.760468 | 0.023088  | -0.038435 | C                      | -0.704484 | 0.016437  | -0.022481 | C                      | -0.69764  | 0.015953  | -0.022756 |
| C                      | 0.760468  | -0.023088 | 0.038435  | C                      | 0.704484  | -0.016437 | 0.022481  | C                      | 0.69764   | -0.015953 | 0.022756  |
| C                      | -1.568729 | -1.97208  | -1.39062  | C                      | -1.539562 | -1.985874 | -1.36113  | C                      | -1.537876 | -1.986591 | -1.35966  |
| C                      | 1.568729  | 1.97208   | 1.39062   | C                      | 1.539562  | 1.985874  | 1.36113   | C                      | 1.537876  | 1.986591  | 1.35966   |
| H                      | -6.253067 | 1.553608  | 0.181788  | H                      | -6.214593 | 1.532851  | 0.202854  | H                      | -6.212822 | 1.533715  | 0.205205  |
| H                      | 6.253067  | -1.553608 | -0.181788 | H                      | 6.214593  | -1.532851 | -0.202854 | H                      | 6.212822  | -1.533715 | -0.205205 |
| H                      | -4.064925 | 2.67422   | -0.063982 | H                      | -4.035861 | 2.653105  | -0.049091 | H                      | -4.034956 | 2.655754  | -0.044223 |
| H                      | 4.064925  | -2.67422  | 0.063982  | H                      | 4.035861  | -2.653105 | 0.049091  | H                      | 4.034956  | -2.655754 | 0.044223  |
| H                      | -4.350148 | -2.272758 | 0.295675  | H                      | -4.311194 | -2.292036 | 0.334782  | H                      | -4.306427 | -2.289694 | 0.331948  |
| H                      | 4.350148  | 2.272758  | -0.295675 | H                      | 4.311194  | 2.292036  | -0.334782 | H                      | 4.306427  | 2.289694  | -0.331948 |
| H                      | -6.381953 | -0.893113 | 0.368208  | H                      | -6.346498 | -0.913108 | 0.404183  | H                      | -6.342969 | -0.913088 | 0.401871  |
| H                      | 6.381953  | 0.893113  | -0.368208 | H                      | 6.346498  | 0.913108  | -0.404183 | H                      | 6.342969  | 0.913088  | -0.401871 |
| H                      | -0.585333 | -2.406258 | -1.512558 | H                      | -0.553727 | -2.409714 | -1.501032 | H                      | -0.552557 | -2.411633 | -1.499483 |
| H                      | 0.585333  | 2.406258  | 1.512558  | H                      | 0.553727  | 2.409714  | 1.501032  | H                      | 0.552557  | 2.411633  | 1.499483  |
| H                      | -2.297215 | -2.775147 | -1.398551 | H                      | -2.260291 | -2.796145 | -1.364989 | H                      | -2.259373 | -2.796225 | -1.361653 |
| H                      | 2.297215  | 2.775147  | 1.398551  | H                      | 2.260291  | 2.796145  | 1.364989  | H                      | 2.259373  | 2.796225  | 1.361653  |
| H                      | -1.767498 | -1.320413 | -2.234487 | H                      | -1.751379 | -1.331891 | -2.199212 | H                      | -1.749467 | -1.333991 | -2.198838 |
| H                      | 1.767498  | 1.320413  | 2.234487  | H                      | 1.751379  | 1.331891  | 2.199212  | H                      | 1.749467  | 1.333991  | 2.198838  |
| H                      | -0.67761  | -2.519314 | 0.918754  | H                      | -0.685124 | -2.582845 | 0.952629  | H                      | -0.685725 | -2.582764 | 0.953735  |
| H                      | 0.67761   | 2.519314  | -0.918754 | H                      | 0.685124  | 2.582845  | -0.952629 | H                      | 0.685725  | 2.582764  | -0.953735 |
| O                      | -1.18063  | 2.379618  | -0.249127 | O                      | -1.180542 | 2.393494  | -0.206828 | O                      | -1.181338 | 2.395906  | -0.208033 |
| O                      | 1.18063   | -2.379618 | 0.249127  | O                      | 1.180542  | -2.393494 | 0.206828  | O                      | 1.181338  | -2.395906 | 0.208033  |
| O                      | -1.499045 | -2.053016 | 1.030161  | O                      | -1.474809 | -2.068963 | 1.061838  | O                      | -1.473307 | -2.065716 | 1.063179  |
| O                      | 1.499045  | 2.053016  | -1.030161 | O                      | 1.474809  | 2.068963  | -1.061838 | O                      | 1.473307  | 2.065716  | -1.063179 |

**Table S3.** Cartesian coordinates of the fully optimized structures of Model-1 and Model-2.

## Section II: Crystal phase

Geometries optimized at the PBE+D2 in the crystal phase

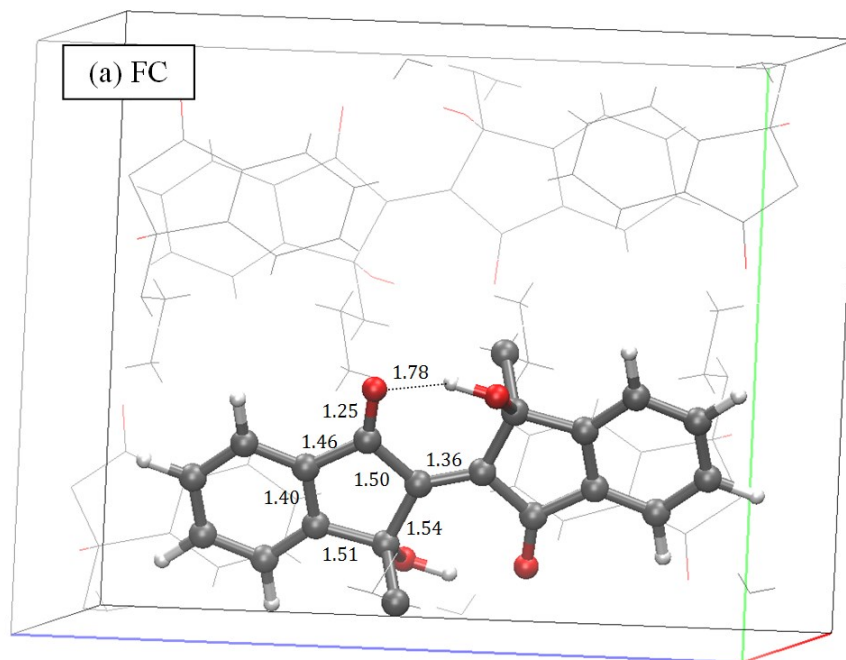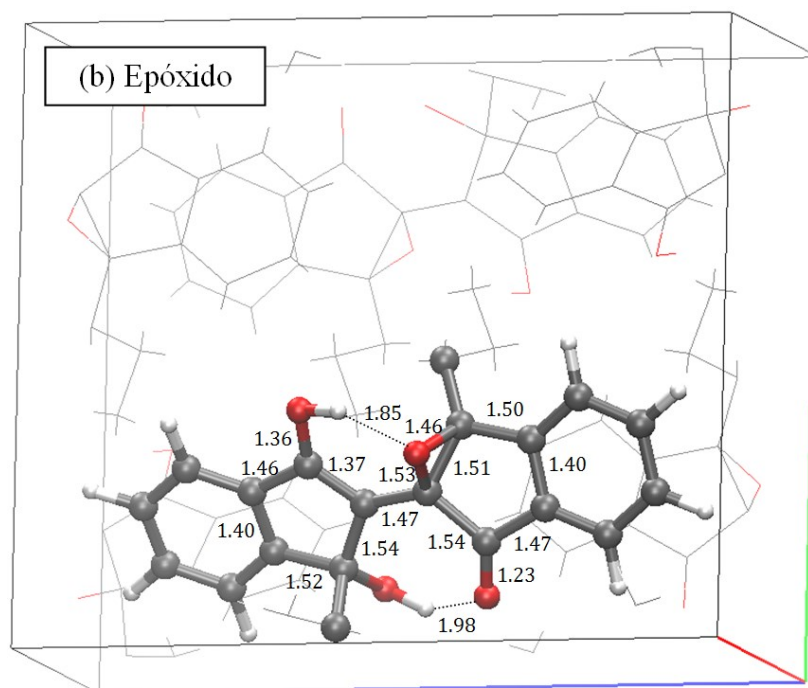

(c) Epóxido Rotado

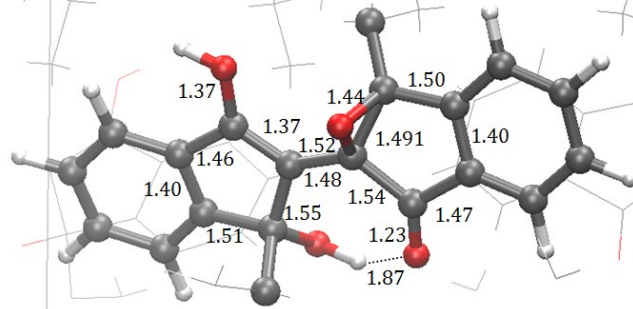

(d)  ${}^3(n \rightarrow \pi^*)$

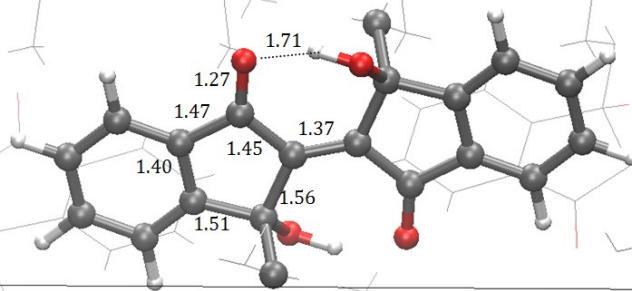

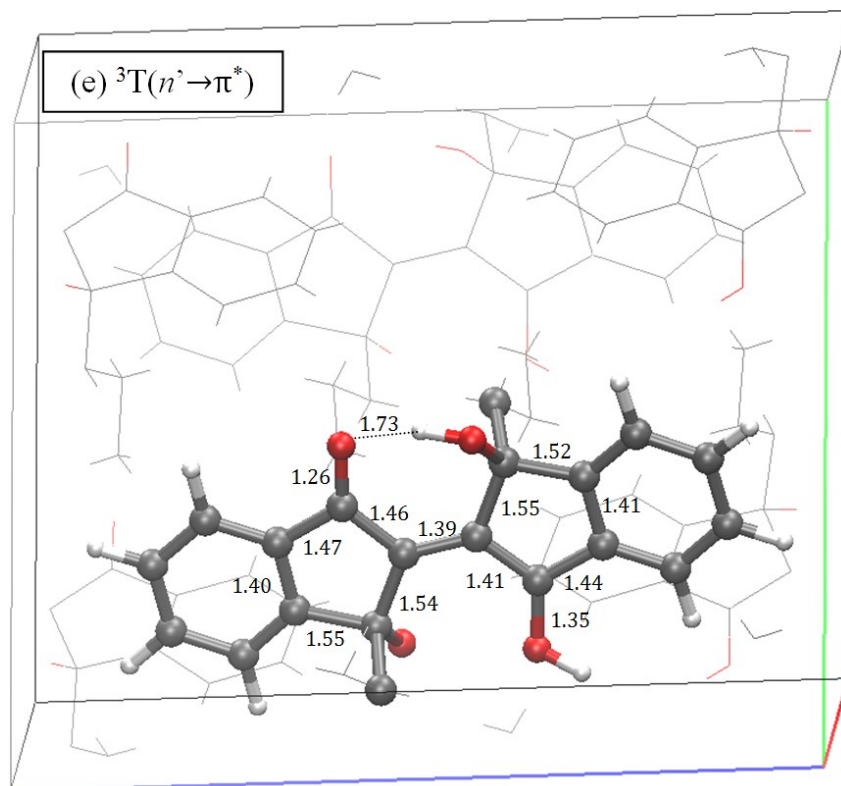

**Figure S10.** Geometries of the stationary points located at the PBE+D2 level using PBC.

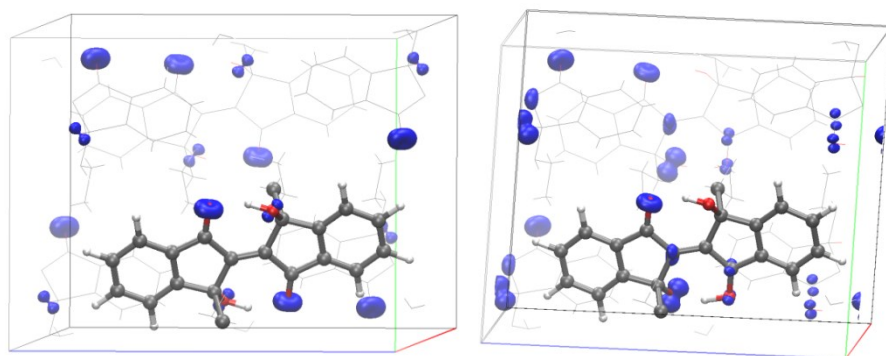

(a) Sym- $^3n\pi^*$

(b)  $^3P(p_0\pi^*)$

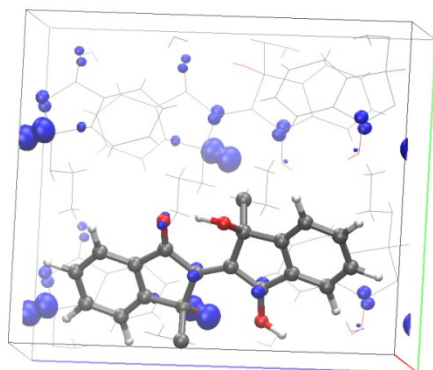

(c)  $^3P(n'\pi^*)$

**Figure S11.** Spin densities of  $T_1$  at the different stationary points located on  $T_1$
